# Supplementary material for: Therapeutic effect of long-interval repeated subcutaneous administration of canine amniotic membrane-derived mesenchymal stem cells in atopic dermatitis mouse model
Source: Springer Nature journal article supplement (doi:10.1186/s12917-025-04554-w), 2025-02-27
Supplement: MOESM1 [file 12917_2025_4554_MOESM1_ESM.pdf]

Supplementary Figures

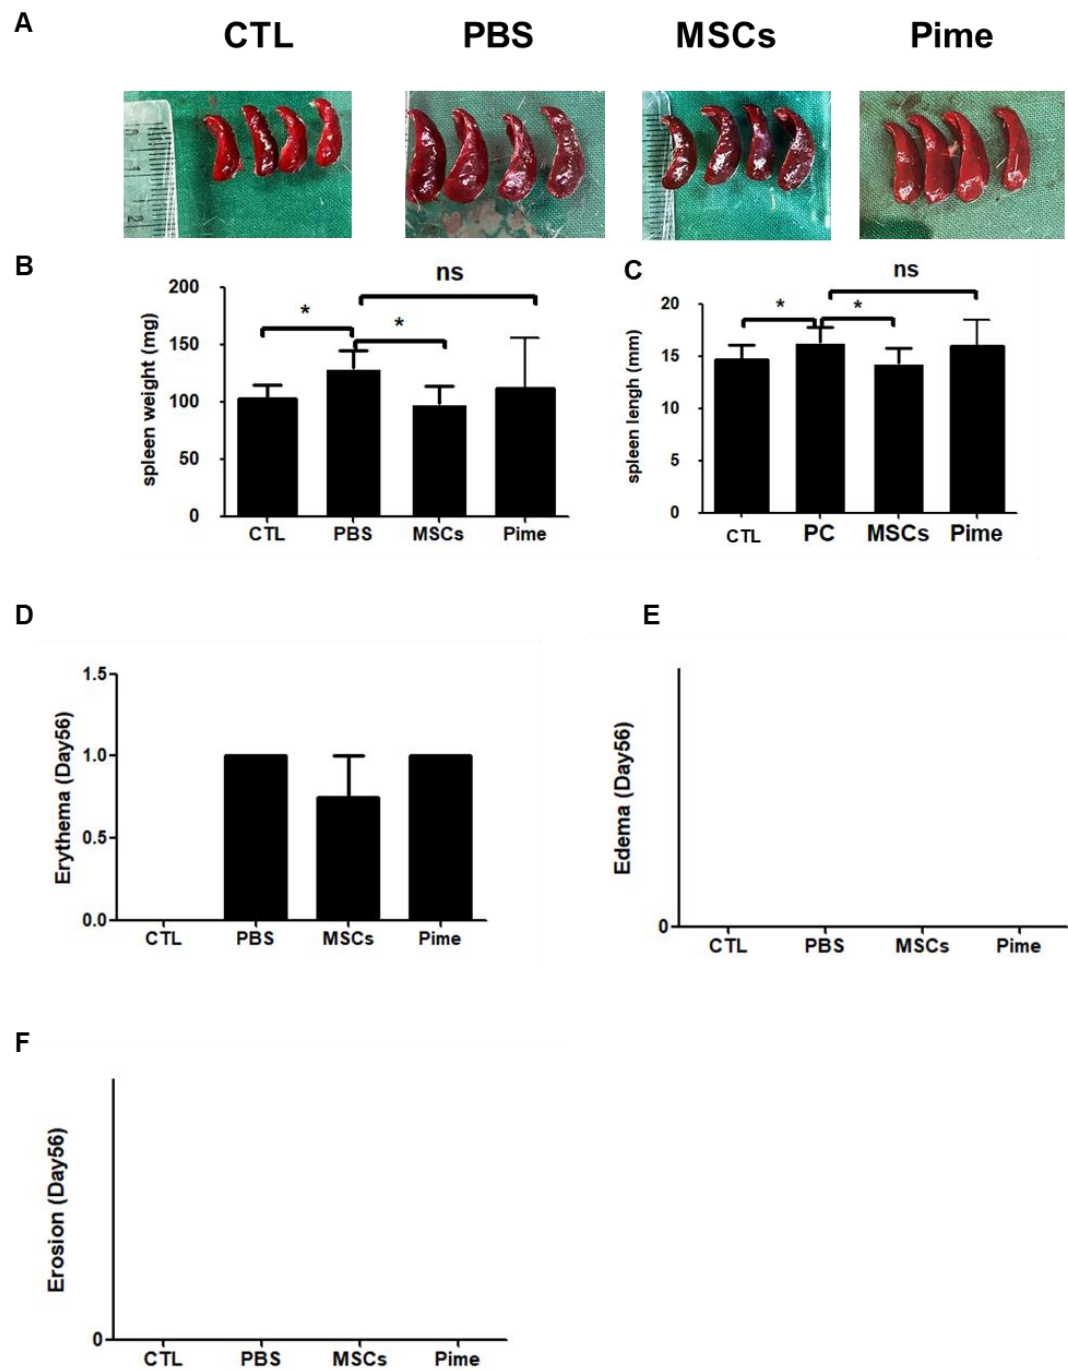

**Supplementary Figure 1.** (A-C) Representative spleen images (A) of CTLs, PBS, MSCs, and Pime, Quantifications of spleen weight (B) and length (C). n = 4 in each spleen; mean±SD; \* p < 0.05, n.s. not significantly different versus the control. (D-F) the severity scores of erythema (D), edema (E), and erosion (F) for CTL, PBS, MSCs and Pime on Day 56 (none, 0; mild, 1; moderate, 2; and severe, 3).

Supplementary Figures

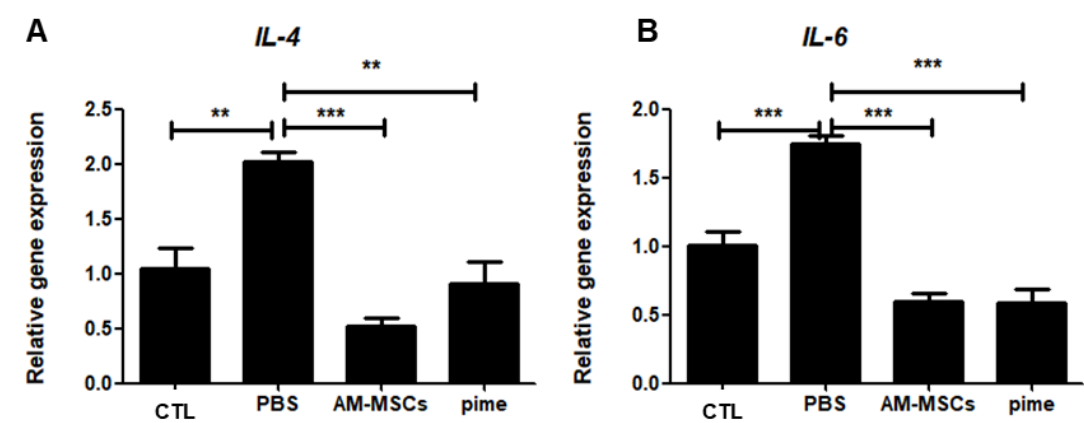

**Supplementary Figure 2.**(A, B) Gene expression related to inflammation: *IL-4* (A) and *IL-6* (B). Three independent analyses were conducted for each gene.

## Supplementary Tables

**Supplementary Table 1.**List of primers for Real time PCR.

| Gene         | Target | Sequence(5'→3', forward)   | Sequence(5'→3', reverse)    | Temp(°C) |
|--------------|--------|----------------------------|-----------------------------|----------|
| <b>IL-6</b>  | Mouse  | AGTGAGGAACAAGCCAGAG<br>C   | AGCTGCGCAGAATGAGAT<br>GA    | 60°C     |
| <b>IL-4</b>  | Mouse  | TGCTAGGCAAGCAGGAGGT<br>GAT | GTGGCACCATAGGCATAA<br>TCTGG | 60°C     |
| <b>GAPDH</b> | Mouse  | GGCATTGCTCTCAATGACA<br>A   | TGTGAGGGAGATGCTCAG<br>TG    | 60°C     |

**Supplementary Table 2.**List of antibodies.

| <b>Antibody</b>                | <b>Working Dilutions</b> | <b>supplier</b> | <b>Catalog Number</b> | <b>Method</b> |
|--------------------------------|--------------------------|-----------------|-----------------------|---------------|
| <b>COX-2</b>                   | 1 : 500                  | Abcam           | Cat. #ab15191         | IHC           |
| <b>IDO-1</b>                   | 1 : 500                  | Merck           | Cat. # 05-840         | IHC           |
| <b>TGF-<math>\beta</math>1</b> | 1 : 500                  | Abcam           | Cat. # ab27969        | IHC           |
| <b>Mast cell tryptase</b>      | 1: 500                   | Abcam           | Cat. # ab2378         | IHC           |
| <b>CD31/PECAM-1</b>            | 1: 500                   | R&D systems     | Cat. # AF3628         | IHC           |
| <b>CD90</b>                    | 1 : 500                  | Invitrogen      | Cat.#12-5900-42       | IHC           |
| <b>Dapi</b>                    | 1 : 1000                 | Merck           | Cat. #D9542           | IHC           |
